# Supplementary material
Source: PubMed Central journal article supplement (PMC3948811)
Supplement: 3c6b17c3a85b4b7e85dea210fbb82fbf_genetics.113.160291-12.pdf [file 3c6b17c3a85b4b7e85dea210fbb82fbf_genetics.113.160291-12.pdf]

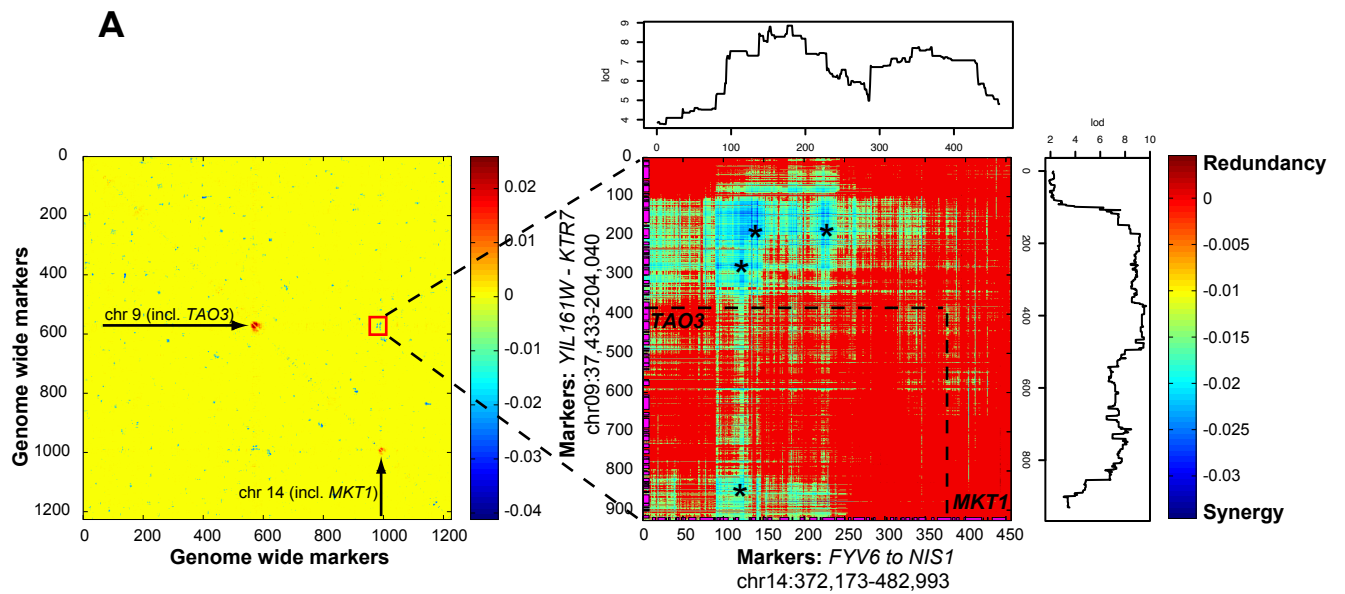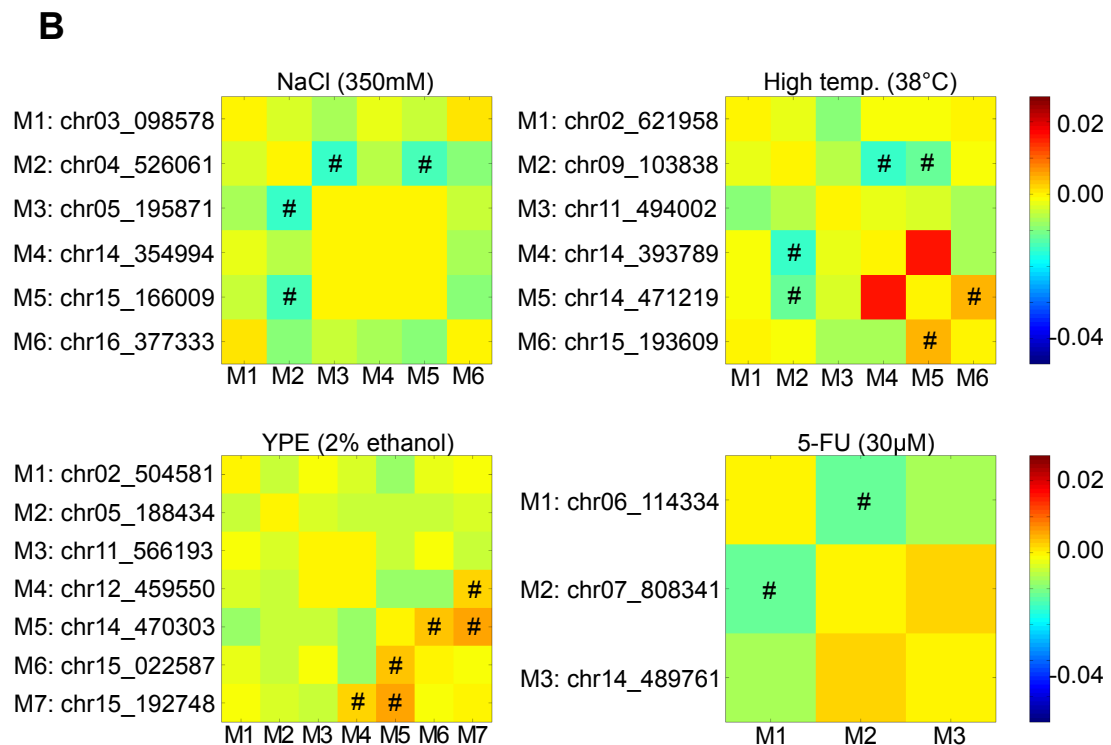

**Figure S2: Interaction plots. (A)** Heatmap of pairwise Interaction Distance (ID) between 1226 markers for high temperature phenotype (left panel). Blue points indicate strong synergistic effect between markers while red points indicate redundancy between markers (also seen in regions with high linkage). We focused on an interaction region between chr9 and chr14 by analysing it further with a denser markers set (977 and 479 respectively). The heatmap of this recalculated Interaction Distance is shown on the right panel. Several regions with low ID scores are seen (marked with \*), suggesting the presence of additional interactions in this region, other than the confirmed
