# Supplementary material
Source: PubMed Central journal article supplement (PMC3948811)
Supplement: 04f90aee893d904b29c690d32081e4fe_genetics.113.160291-4.pdf [file 04f90aee893d904b29c690d32081e4fe_genetics.113.160291-4.pdf]

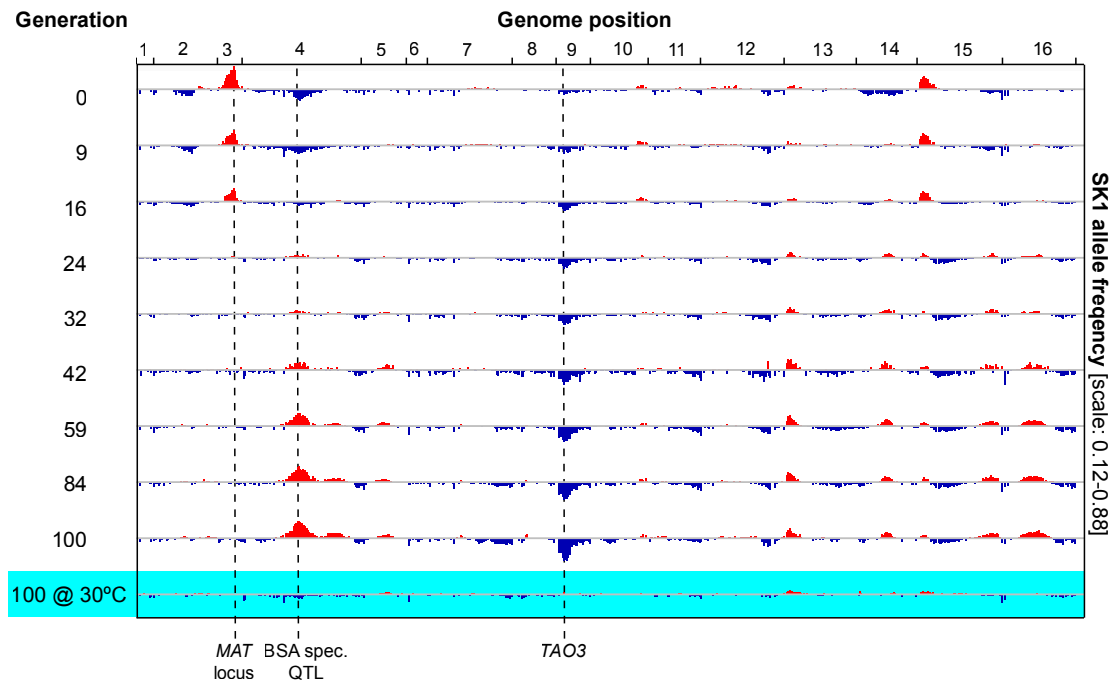

**Figure S10: Time course of high temperature QTLs in BSA.** To obtain a profile of the progression of allele enrichment, we sequenced samples of the BSA pool at nine different time points under high temperature (38°C) condition. BSA samples with red amplitude corresponding to enrichment of the SK1 allele and blue to the S96 allele. A time-dependent decrease of an initially strong SK1 allele enrichment on chr 3 to 50% allele frequency was observed between generation 16 and 24. This QTL on chr 3 corresponds to the *MATa* locus used for the initial selection of haploid progeny for BSA. The loss of this loci was confirmed to be due to a switch from a haploid to diploid population over time. Very little selection was observed in the control pool (30°C) after 100 generations (bottom line with light blue background) and a loss of *MATa* peak on chr 3 was observed as well. The QTL on chr 4 is specific to BSA while the QTL on chr 9 is the major ISA QTL and includes the *TAO3* gene.

## References

Granek JA, Magwene PM. 2010. Environmental and Genetic Determinants of Colony Morphology in Yeast. *PLoS Genet* **6**(1): e1000823.
