# Supplementary material
Source: PubMed Central journal article supplement (PMC3948811)
Supplement: 7ff8d16ce14a5aed243ce882c53ee5c0_genetics.113.160291-14.pdf [file 7ff8d16ce14a5aed243ce882c53ee5c0_genetics.113.160291-14.pdf]

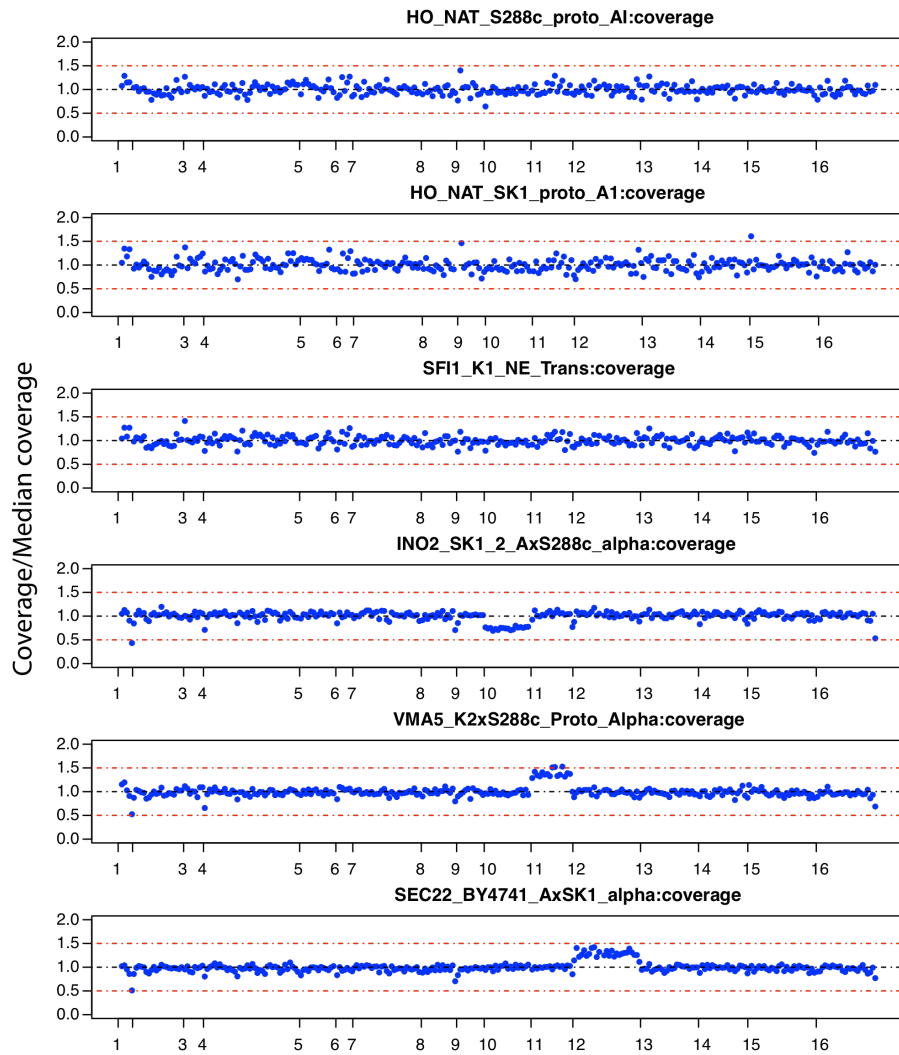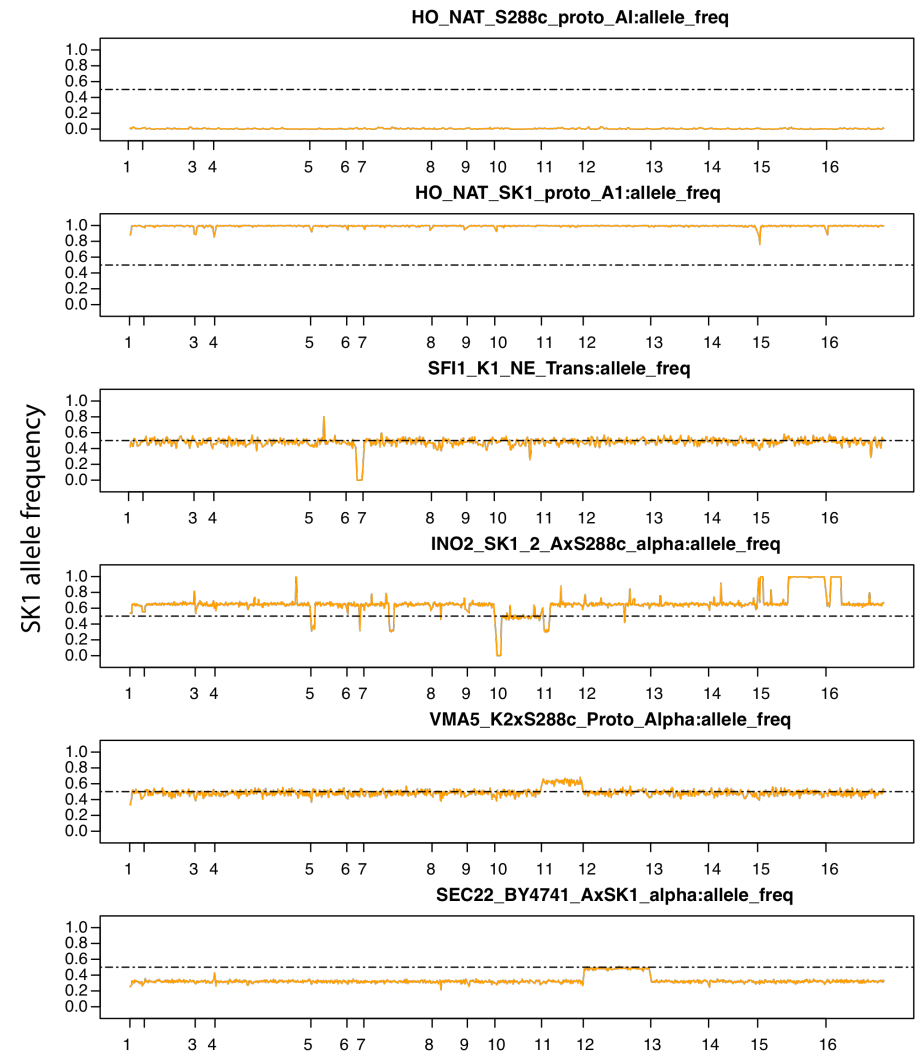

Coverage/Median coverage

SK1 allele frequency

**Figure S9: Resequencing of 50 RHS strains reveals a high rate of aneuploidy.**

Except for cantharidin resistance, RHS results did not identify the QTGs found by ISA or BSA. By resequencing 50 of the original RHS deletion strains we found that 17 carried chromosomal aberrations (see examples above and Table S5 for summary). Left panels shows copy number variation and right panel shows allele frequency (100% SK1 = 1), for each sample along the different chromosomes. HO\_NAT\_S288c\_protoA1 and HO\_NAT\_SK1\_protoA1 are parental strains used in the construction of RHS strains and showed no abnormalities. The remaining four strains showed either a loss of heterozygosity (SF1\_K1\_NE\_Trans), a copy number variation (VMA5\_K2xS288c\_Proto\_Alpha, chr 11, 3 copies) or a combination of both (INO2\_SK1\_2\_AxS288c\_alpha, a triploid across all chromosomes except for chr 10 and loss of heterozygosity on chr 15). Among the sequenced strains, seven triploid strains could be detected, likely originating from mating of a diploid with a haploid strain (e.g. two genome copies of S96, one of SK1). In addition, four out of 12 randomly picked strains harbored an extra chromosome, suggesting a widespread aneuploidy in the RHS collection.
