# Supplementary material
Source: PubMed Central journal article supplement (PMC3948811)
Supplement: 86beddffccde1eb44f7ebef05e23fa04_genetics.113.160291-3.pdf [file 86beddffccde1eb44f7ebef05e23fa04_genetics.113.160291-3.pdf]

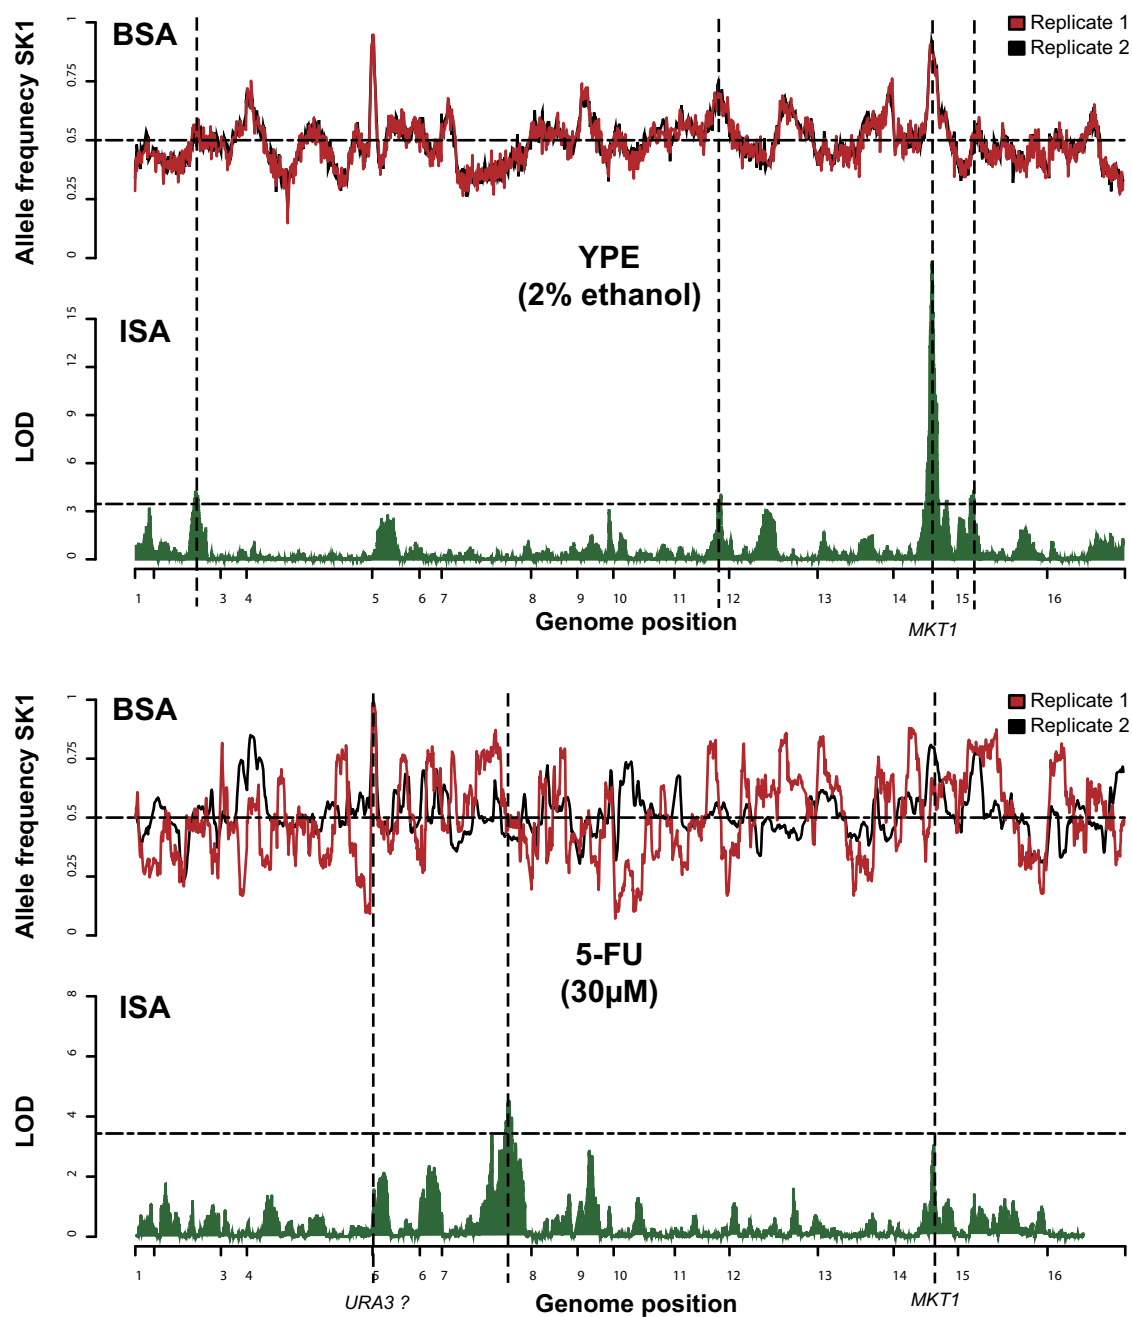

**Figure S8: QTLs mapped for YPE and 5-FU by BSA and ISA.** For YPE (2% ethanol, upper two panels) allele frequencies deduced from the two BSA replicates (red and blue) were highly reproducible. A QTL peak on chr 11 and one on chr 14 (*MKT1* locus) is common for BSA and ISA. Dashed horizontal line in ISA marks the significant threshold. For 5-FU (30µM 5-fluorouracil, lower two panels) the replicates from BSA are not reproducible, except for the *URA3* locus. Sequencing results suggest that beneficial mutations in

individual cells occurred during the selection process of BSA and result in random allele selection.
