# Supplementary material
Source: PubMed Central journal article supplement (PMC3948811)
Supplement: 0223c0b4aef6262b8fdd1e8c2f4ffd3a_genetics.113.160291-9.pdf [file 0223c0b4aef6262b8fdd1e8c2f4ffd3a_genetics.113.160291-9.pdf]

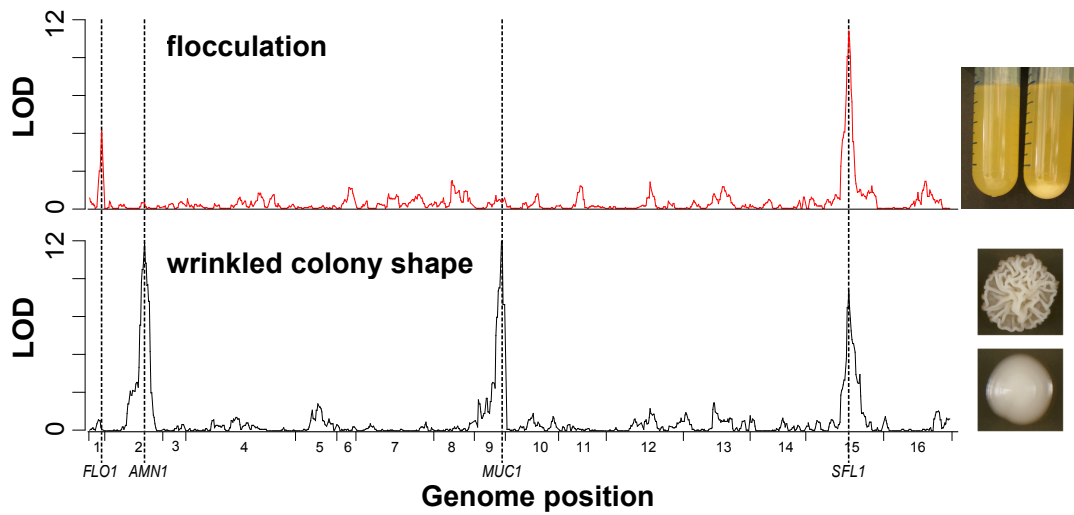

**Figure S4: QTLs mapped for flocculation and colony shape by ISA.** For flocculation (red line) two strong QTLs were found, within which we identified two causative genes: *FLO1* (beneficial allele from S96) and *SFL1* (beneficial allele from SK1). For wrinkled colony shape (black line) we identified three QTGs *AMN1*, *MUC1* and *SFL1*.
