# Supplementary material
Source: PubMed Central journal article supplement (PMC3948811)
Supplement: 75921116986b5a3f7aabdc952784ceb4_genetics.113.160291-2.pdf [file 75921116986b5a3f7aabdc952784ceb4_genetics.113.160291-2.pdf]

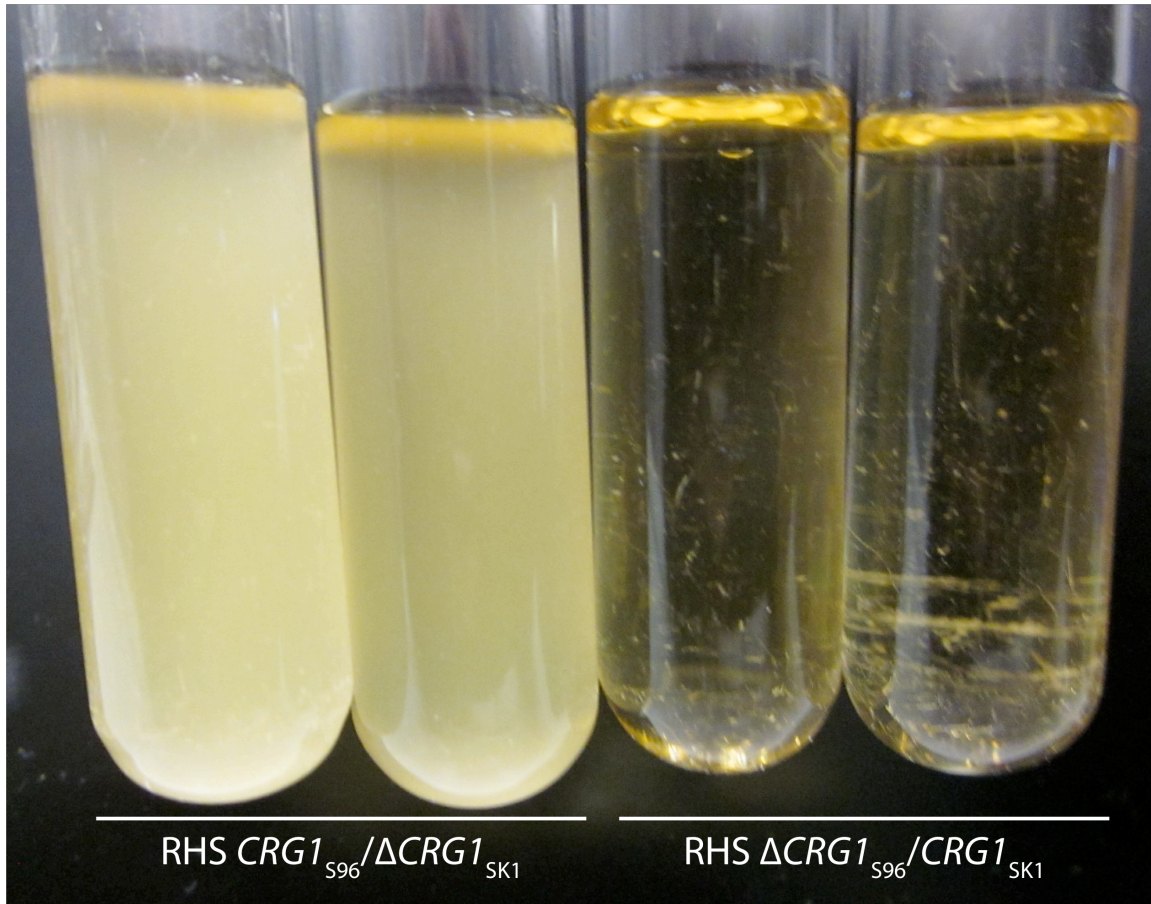

**Figure S3: Confirmation of  $CRG1_{S96}$  as the causative allele for cantharidin resistance using RHS hemizygous strains.** Two biological replicates of each  $CRG1$  hemizygous strains were grown overnight in YPD until saturation. 10  $\mu$ l of each culture were used to inoculate 5 ml of YPD + 350  $\mu$ M cantharidin. These cultures were then grown for 12h at 30°C under agitation. When the S96 allele was deleted, the hemizygous strains were unable to grow in presence of cantharidin, while no effect was observed when the SK1 allele was deleted.
