# Supplementary material
Source: PubMed Central journal article supplement (PMC3948811)
Supplement: c95b19df92c48fc05ea1631d10552365_genetics.113.160291-18.pdf [file c95b19df92c48fc05ea1631d10552365_genetics.113.160291-18.pdf]

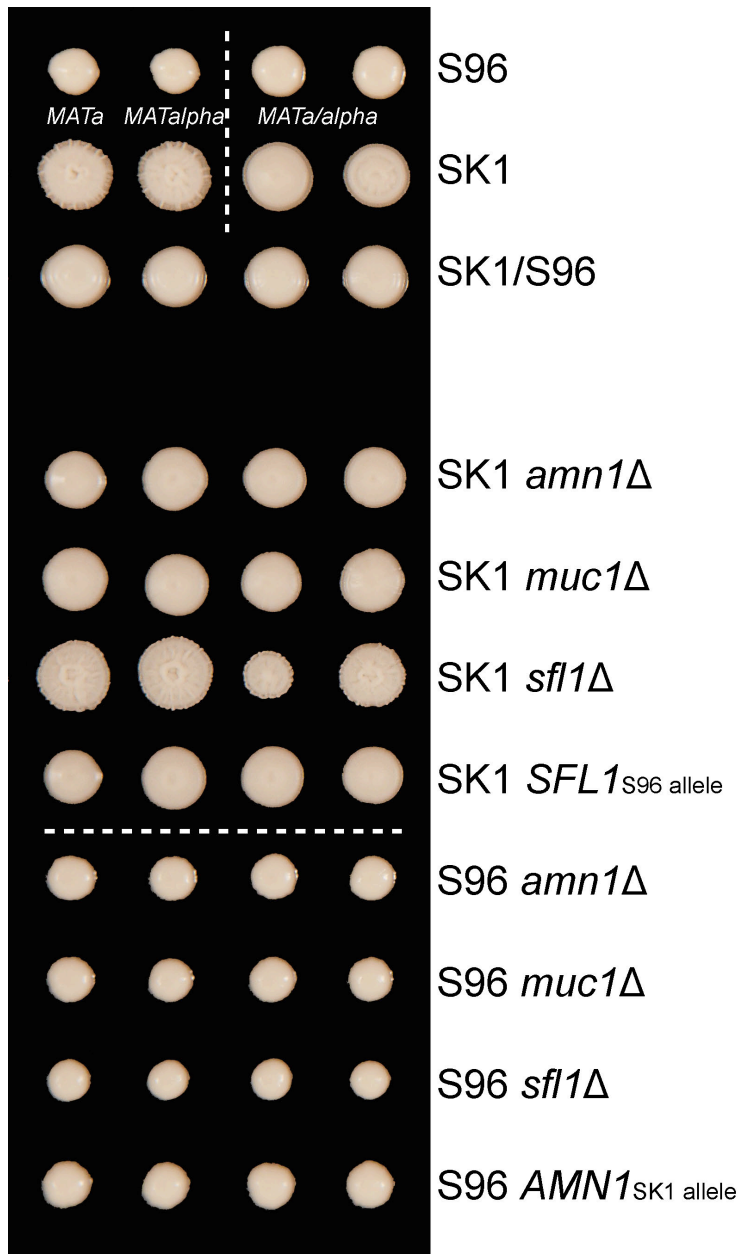

**Figure S5: Confirmation of three genes causing wrinkled colony shape in SK1.** Picture of the parental strains (three upper panels) and deletion/allele replacement strains in the SK1 and S96 background (eight lower panels). S96 shows a smooth colony shape and SK1 has a wrinkled colony when haploid. As previously reported for  $\Sigma 1278b$  (Granek and Magwene 2010), the wrinkled colony shape observed in our haploid SK1 cells was more pronounced than in the diploid SK1 cells. Here we confirm three genes underlying the QTLs shown in Figure S1. The wrinkled colony shape of SK1 haploids was lost when either *AMN1* or *MUC1* is deleted, or when *SFL1* allele is exchanged by the S96 allele. Deletion of these genes in S96 haploid cells or allele exchange of *AMN1* did not change the colony shape.
