# Supplementary material
Source: PubMed Central journal article supplement (PMC3948811)
Supplement: df5522a4972347d1857de9eb44a4244d_genetics.113.160291-15.pdf [file df5522a4972347d1857de9eb44a4244d_genetics.113.160291-15.pdf]

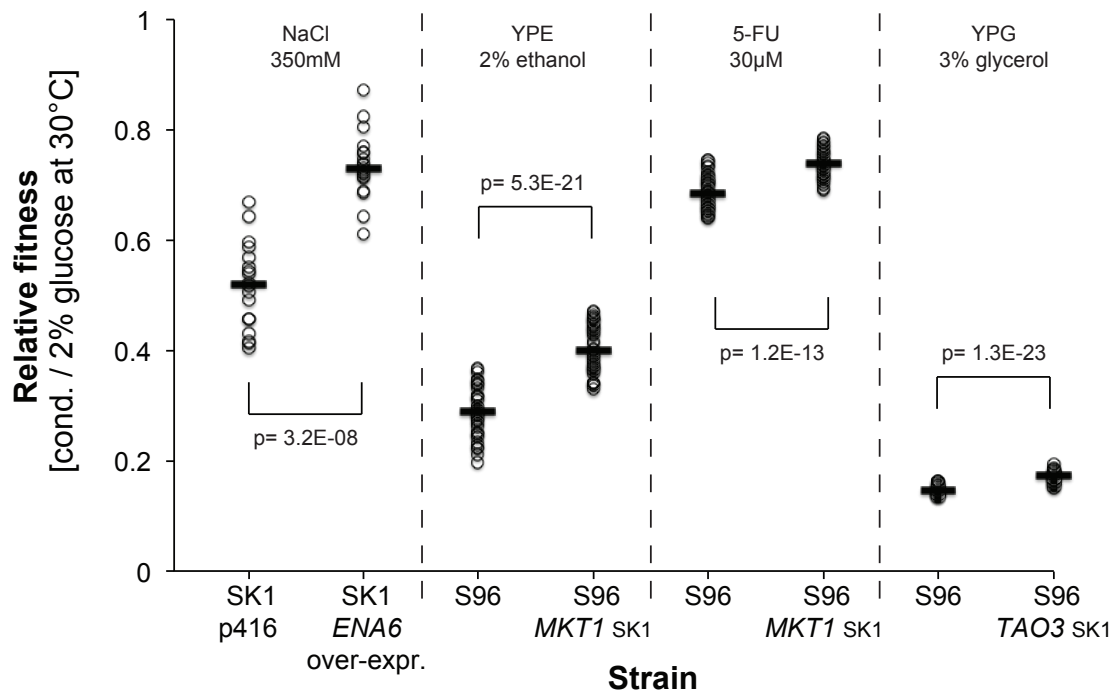

**Figure S7: Confirmation of quantitative trait genes.** Effects of *ENA6* over-expression on growth under high salt condition (350mM NaCl), of *MKT1* allele exchange for growth in YPE (2% ethanol) and 5-FU (30µM) and of *TAO3* allele exchange for YPG (3% glycerol). Each dot represents an independent transformant. The p-values were calculated by Student's t-test. For the high salt phenotype SK1 cells were either transformed with an empty p416 vector (control) or a p416 vector expressing *ENA6*.

*TAO3 - MKT1* interaction. **(B)** The ID was also calculated between QTLs identified from ISA for high salt (350mM NaCl), high temperature (38°C), YPE (2% ethanol), and 5-FU (30µM). Blue squares indicate synergistic interactions between QTLs and orange squares, redundancy between QTLs. Significant interactions are marked with a hash key (#), red squares for the high temperature phenotype are due to linkage between markers M4 and M5.
