# Supplementary material
Source: PubMed Central journal article supplement (PMC3948811)
Supplement: f16c48d109e03e71f369ee70f5987ae1_genetics.113.160291-7.pdf [file f16c48d109e03e71f369ee70f5987ae1_genetics.113.160291-7.pdf]

95% confidence size versus sample size

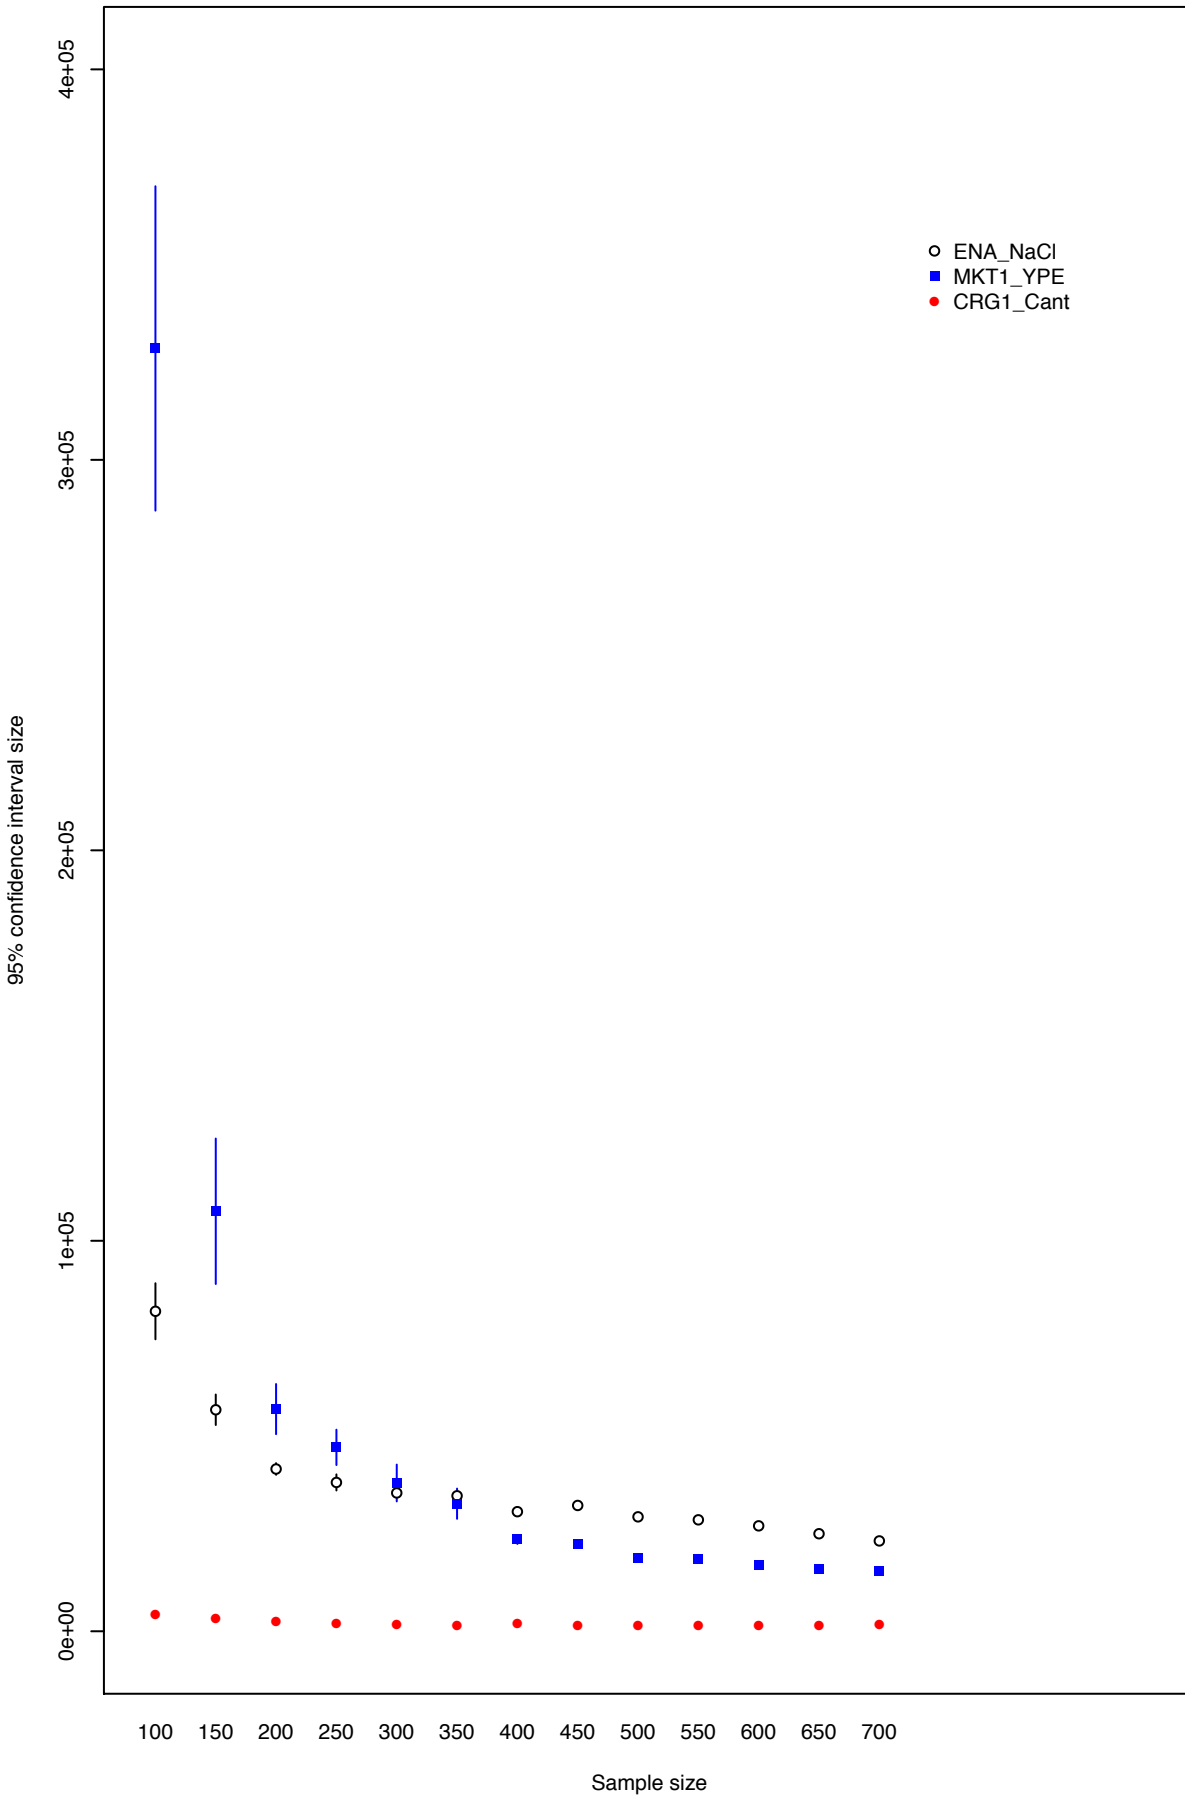

95% Confidence interval for CRG in Cantharidin

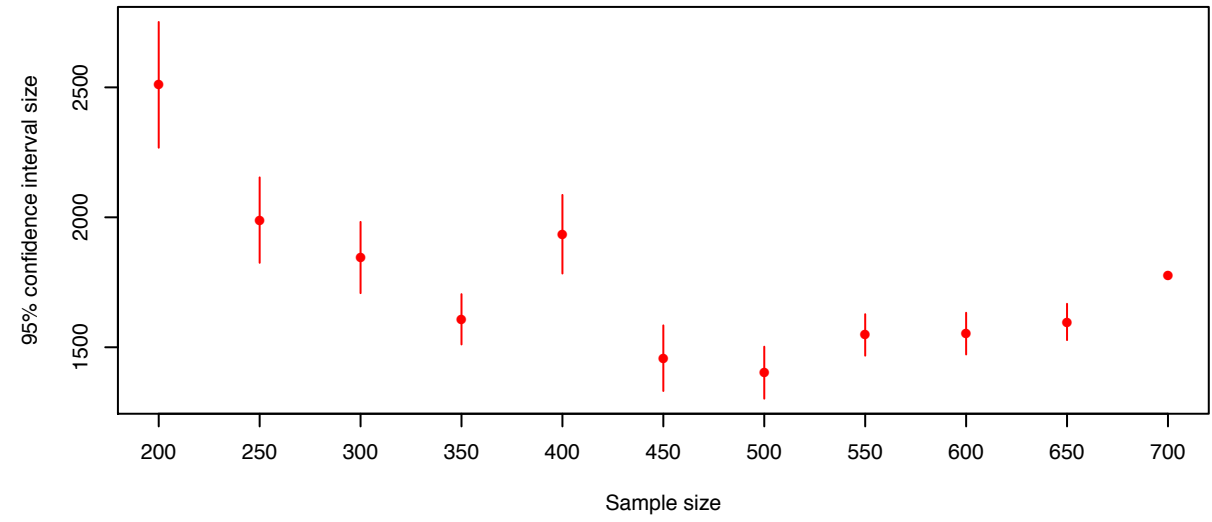

95% Confidence interval for MKT1 in YPE

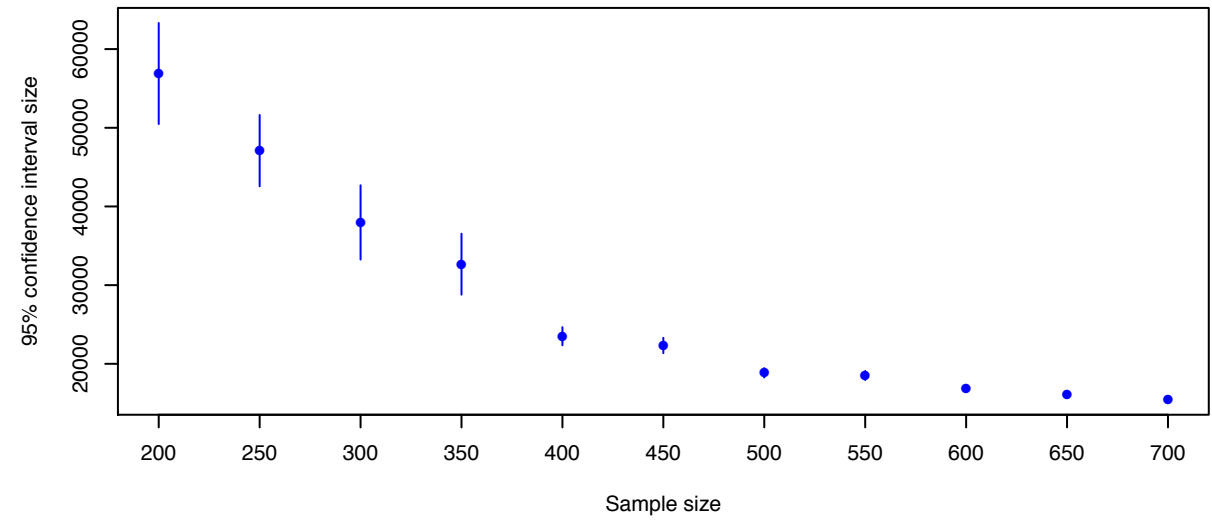

95% Confidence interval for ENA in NaCl

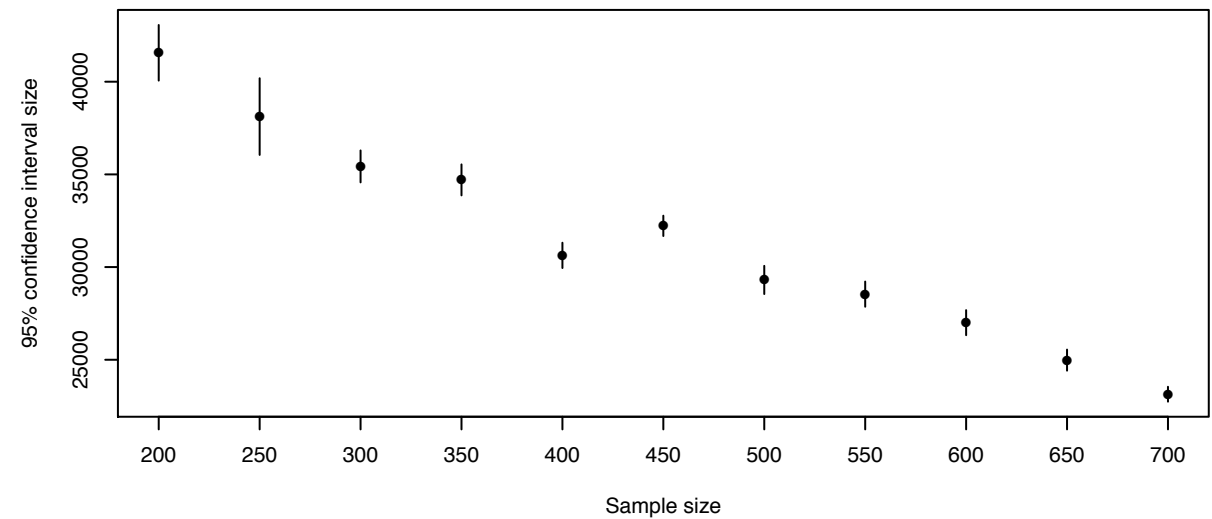

**Figure S6: Plot of resolution (size of 95% confidence interval) vs sample size.** For each tested sample size, the tested number of segregants was selected randomly from the pool of 720. At each sampling, QTL mapping was performed and the 95% confidence interval estimated for the QTL peaks of *CRG1* in cantharidin, *ENA* in NaCl and *MKT1* in YPE. Error bars show SEM of the size of the 95% confidence.
